# Supplementary material
Source: ML conference proceedings conference paper supplement (https://proceedings.neurips.cc/paper_files/paper/2024/hash/c112271dab20d38b43a1c0669f86b4f6-Abstract.html)
Supplement: Supplementary file 1 [file c112271dab20d38b43a1c0669f86b4f6-Supplemental-Datasets_and_Benchmarks_Track.pdf]

---

# NetworkGym: Reinforcement Learning Environments for Multi-Access Traffic Management in Network Simulation (Supplementary Material)

---

**Momin Haider**  
UC, Santa Barbara  
momin@ucsb.edu

**Ming Yin**  
Princeton University  
my0049@princeton.edu

**Menglei Zhang**  
Intel Labs  
menglei.zhang@intel.com

**Arpit Gupta**  
UC, Santa Barbara  
arpitgupta@cs.ucsb.edu

**Jing Zhu**  
Intel Labs  
jing.z.zhu@intel.com

**Yu-Xiang Wang**  
UC, San Diego  
yuxiangw@ucsd.edu

1 We open-source our primary code and offline datasets at [github.com/hmomin/networkgym](https://github.com/hmomin/networkgym). Each  
2 section (except Section 3) in this document references assets relative to the root directory of this  
3 repository.

## 4 1 Computational Resources

5 We make use of four internal 12 GB NVIDIA TITAN Xp GPUs to perform our experiments. With  
6 these GPUS, to perform all experiments described in this document requires roughly 1 month of  
7 compute, assuming each of 8 different CPU processes is used to perform an agent evaluation. Using  
8 only a single process to perform agent evaluation would result in the compute increasing to roughly 3  
9 months.

## 10 2 Offline Data Collection

11 For each of three different heuristic policies (`throughput_argmax`, `system_default`, and  
12 `utility_logistic`), we collect and store 64 episodes of offline data on our Network-  
13 Gym Multi-Access Traffic Splitting environment (denoted `nqos_split`). Each episode  
14 contains 10,000 steps worth of data. The associated configuration file (located at  
15 `network_gym_client/envs/nqos_split/config.json`) for the episodes is chosen with the  
16 following constraints in mind:

- 17 • At initialization of each environment, four UEs are randomly stationed 1.5 meters above the  
18  $x$ -axis between  $x = 0$  and  $x = 80$  meters. From there, they begin to bounce back and forth  
19 in the  $x$ -direction at 1 m/s for the entire duration of an episode.
- 20 • The Wi-Fi access points are stationed at  $(x, z) = (30\text{m}, 3\text{m})$  and  $(x, z) = (50\text{m}, 3\text{m})$ ,  
21 respectively.
- 22 • The LTE base station lies at  $(x, z) = (40\text{m}, 3\text{m})$ .
- 23 • The only change in the configuration file between episodes is the `random_seed` parameter.  
24 We use random seed values from 0 to 63, inclusive, for this parameter.

25 We store the resulting three offline datasets in the `NetworkAgent/buffers` directory. Each dataset  
26 is a folder that contains 64 `.pickle` files, one for each episode. Each `.pickle` file contains a tuple

27 of four numpy arrays in the following order: (states, actions, rewards, next states) with shapes ([9999,  
28 56], [9999, 4], [9999, 1], [9999, 56]), respectively.

29 We also provide a shell script (`offline_collection.sh`) to generate data for offline learning. The  
30 heuristic policy that takes actions in the environments can be specified at the top of the script.

### 31 **3 Training Existing State-of-the-Art Offline RL Algorithms**

32 To test several existing state-of-the-art offline reinforcement learning (RL) algorithms, we make use of  
33 the Clean Offline RL library provided at `github.com/tinkoff-ai/CORL`, which uses the Apache  
34 2.0 license. More specifically, we modify their library at `github.com/hmomin/CORL-compare` to  
35 be compatible with our offline dataset generated on the NetworkGym simulator. The modifications we  
36 make to the offline RL algorithm files (located at `algorithms/offline`) only support the following  
37 purposes:

- 38 • We switch the algorithmic implementations from using D4RL-specific loading to using our  
39 NetworkGym `OfflineEnv` class instead.
- 40 • We remove all resulting unused D4RL-specific environment/dataset loading and evaluation  
41 code.
- 42 • We modify the `env` parameter in the `TrainConfig` class for each algorithm to use an  
43 environment specified by one of our three offline datasets.
- 44 • We modify the `normalize` boolean parameter (where applicable) in the `TrainConfig` class  
45 to toggle whether or not we would like the algorithm to perform feature normalization based  
46 on the offline dataset.

47 Using these modifications, any of the algorithm scripts at `algorithms/offline` can be executed  
48 directly to train these algorithms. We use the default hyperparameters for all algorithms, except  
49 where we toggle the `normalize` parameter.

### 50 **4 Training PTD3**

51 To train our implementation of Pessimistic TD3 (PTD3), we use the default hyperparameters in  
52 TD3+BC, except for the following modifications:

- 53 • We train PTD3 for 10,000 steps, instead of 1,000,000 steps, which we do for TD3+BC.
- 54 • We test PTD3 across various values of  $\alpha$  and  $\beta$ ; we then report the corresponding experi-  
55 mental results.

56 We provide the shell script `train_offline_ptd3.sh` to train PTD3 on any offline dataset generated  
57 by one of our heuristic algorithms. The desired values of offline dataset,  $\alpha$ , and  $\beta$  can be specified at  
58 the top of the script.

### 59 **5 Training Online Deep RL Algorithms**

60 We use `stable-baselines3` to train two different online deep RL algorithms, PPO and SAC. We  
61 do so by initializing a random agent, then updating that agent through 8 successive phases. In  
62 each phase, we parallelize environment instantiations across 8 different random seeds, where each  
63 environment runs for 10,000 steps, resulting in a total of 64 different environment instantiations.  
64 In this way, the online learning algorithm trains across the same number of steps available in each  
65 of the offline datasets, to allow for proper comparison. Additionally, for our parallel environment  
66 random seeds, we use 0-7, inclusive, followed by 8-15, 16-23, ..., 56-63. We provide the shell script,  
67 `train_online_parallel.sh`, in order to perform this training process with PPO and SAC. We use  
68 the default hyperparameters specified by `stable-baselines3`.

## 69 **6 Evaluating Trained Agents**

70 Finally, to evaluate a trained agent (whether online or offline), we place the resulting model file in the  
71 `NetworkAgent/models` directory. Then, the model filename (without extension) can be specified as  
72 the `agent` parameter at the top of the `test_agent.sh` shell script and the script can be executed to  
73 evaluate the agent on a single 3,200 step episode. In our experiments, we evaluate each agent across  
74 32 or 40 episodes (each with a different `random_seed` parameter), depending on the experiment.  
75 Each episode is 3,200 steps and the `random_seed` parameter takes on values between 128-159,  
76 inclusive, for 32 evaluation episodes or 128-167, inclusive, for 40 evaluation episodes. We otherwise  
77 use the same environment configuration details mentioned in Section 2.
